# Supplementary material
Source: MDPI journal article supplement (https://www.mdpi.com/2073-4441/15/7/1411)
Supplement: s1 [file s1]

**Table S1.** Presence of the recorded taxa at sites A, B and C in spring (Sp), summer (Su), autumn (Au) and winter (Wi).

| Taxa                                 | A   |     |     |     | B   |     |     |     | C   |     |     |     |
|--------------------------------------|-----|-----|-----|-----|-----|-----|-----|-----|-----|-----|-----|-----|
|                                      | Sp. | Su. | Au. | Wi. | Sp. | Su. | Au. | Wi. | Sp. | Su. | Au. | Wi. |
| <i>Cerastoderma glaucum</i>          | X   | X   | X   | X   | X   | X   | X   | X   |     | X   |     |     |
| <i>Cerithium vulgatum</i>            | X   |     | X   | X   |     |     |     |     |     |     |     |     |
| Chironomidae                         | X   | X   | X   | X   | X   | X   | X   | X   | X   | X   | X   | X   |
| Corophiidae                          | X   |     |     |     |     |     |     |     |     |     |     |     |
| <i>Ephydra bivittata</i>             |     |     |     |     |     |     |     |     |     | X   | X   |     |
| Gammaridae juv.                      | X   | X   |     |     | X   |     |     |     |     |     |     |     |
| <i>Gammarus aequicauda</i>           | X   | X   | X   | X   | X   | X   |     |     |     |     |     |     |
| <i>Hydrobia acuta</i>                | X   | X   | X   | X   | X   | X   | X   | X   |     |     |     |     |
| <i>Idotea chelipes</i>               | X   | X   | X   | X   |     | X   |     |     | X   | X   | X   | X   |
| <i>Melita palmata</i>                |     | X   | X   |     |     |     | X   |     |     |     |     |     |
| <i>Monocorophium insidiosum</i>      | X   | X   | X   | X   |     |     |     |     |     |     |     |     |
| <i>Monocorophium sextonae</i>        | X   |     | X   |     |     |     |     |     |     |     |     |     |
| <i>Nebrioporus ceresyi</i>           |     |     |     |     | X   | X   | X   | X   | X   | X   | X   | X   |
| Nemertea                             | X   |     | X   | X   |     |     |     | X   |     |     |     |     |
| <i>Neodexiospira pseudocorrugata</i> | X   |     | X   |     |     |     |     |     |     |     |     |     |
| Nereididae juv.                      | X   | X   |     |     |     | X   |     |     |     |     |     |     |
| <i>Perinereis cultrifera</i>         | X   | X   |     |     |     | X   | X   |     |     |     |     |     |
| <i>Victorella pavida</i>             |     |     |     |     | X   | X   |     |     |     |     |     |     |

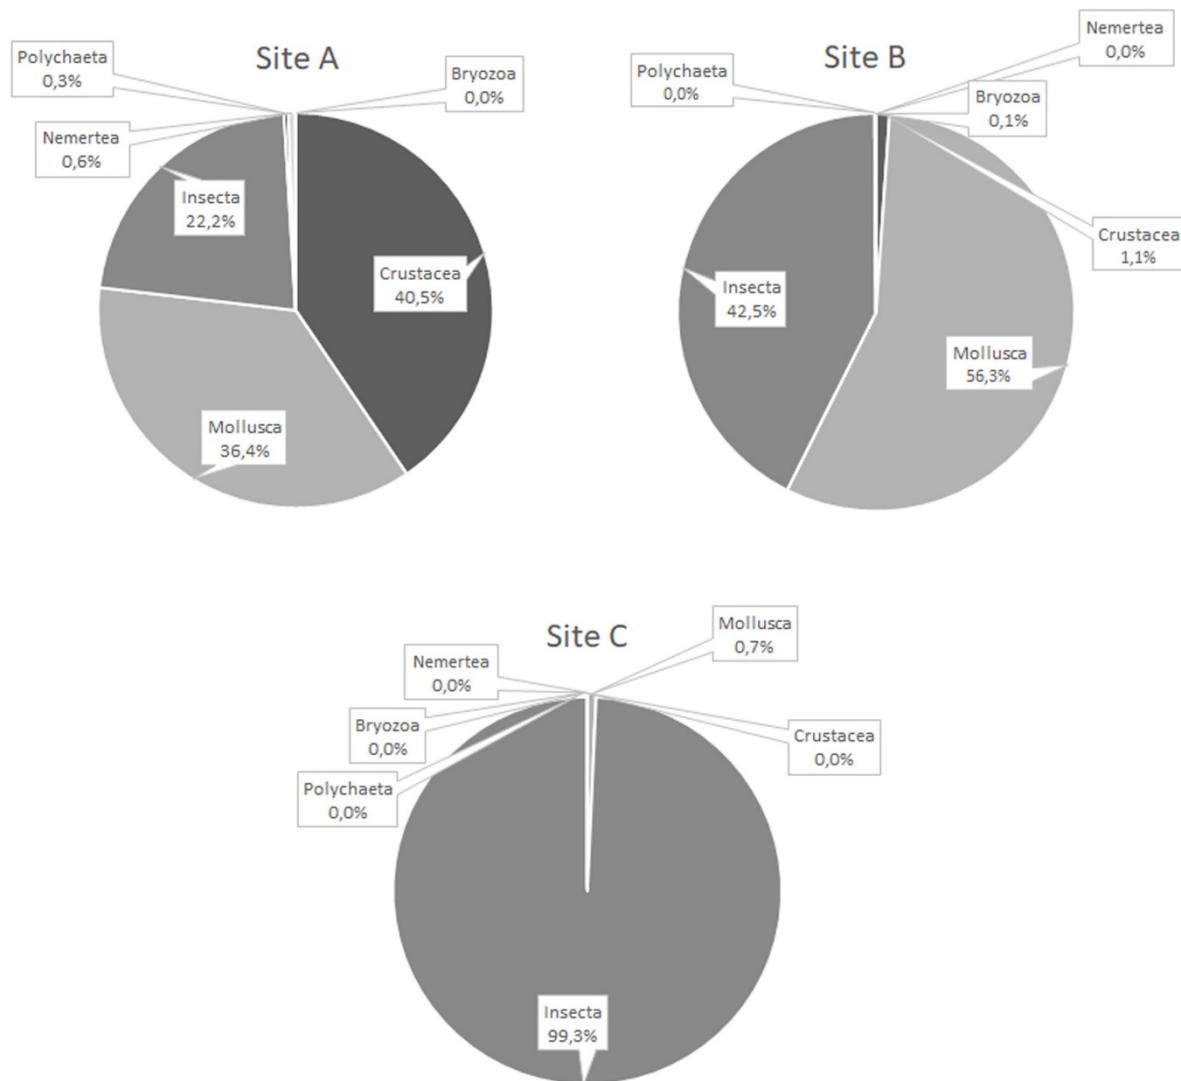

**Figure S1.** Pie graphs showing the relative abundances of the macrozoobenthic taxa in each sampling site.

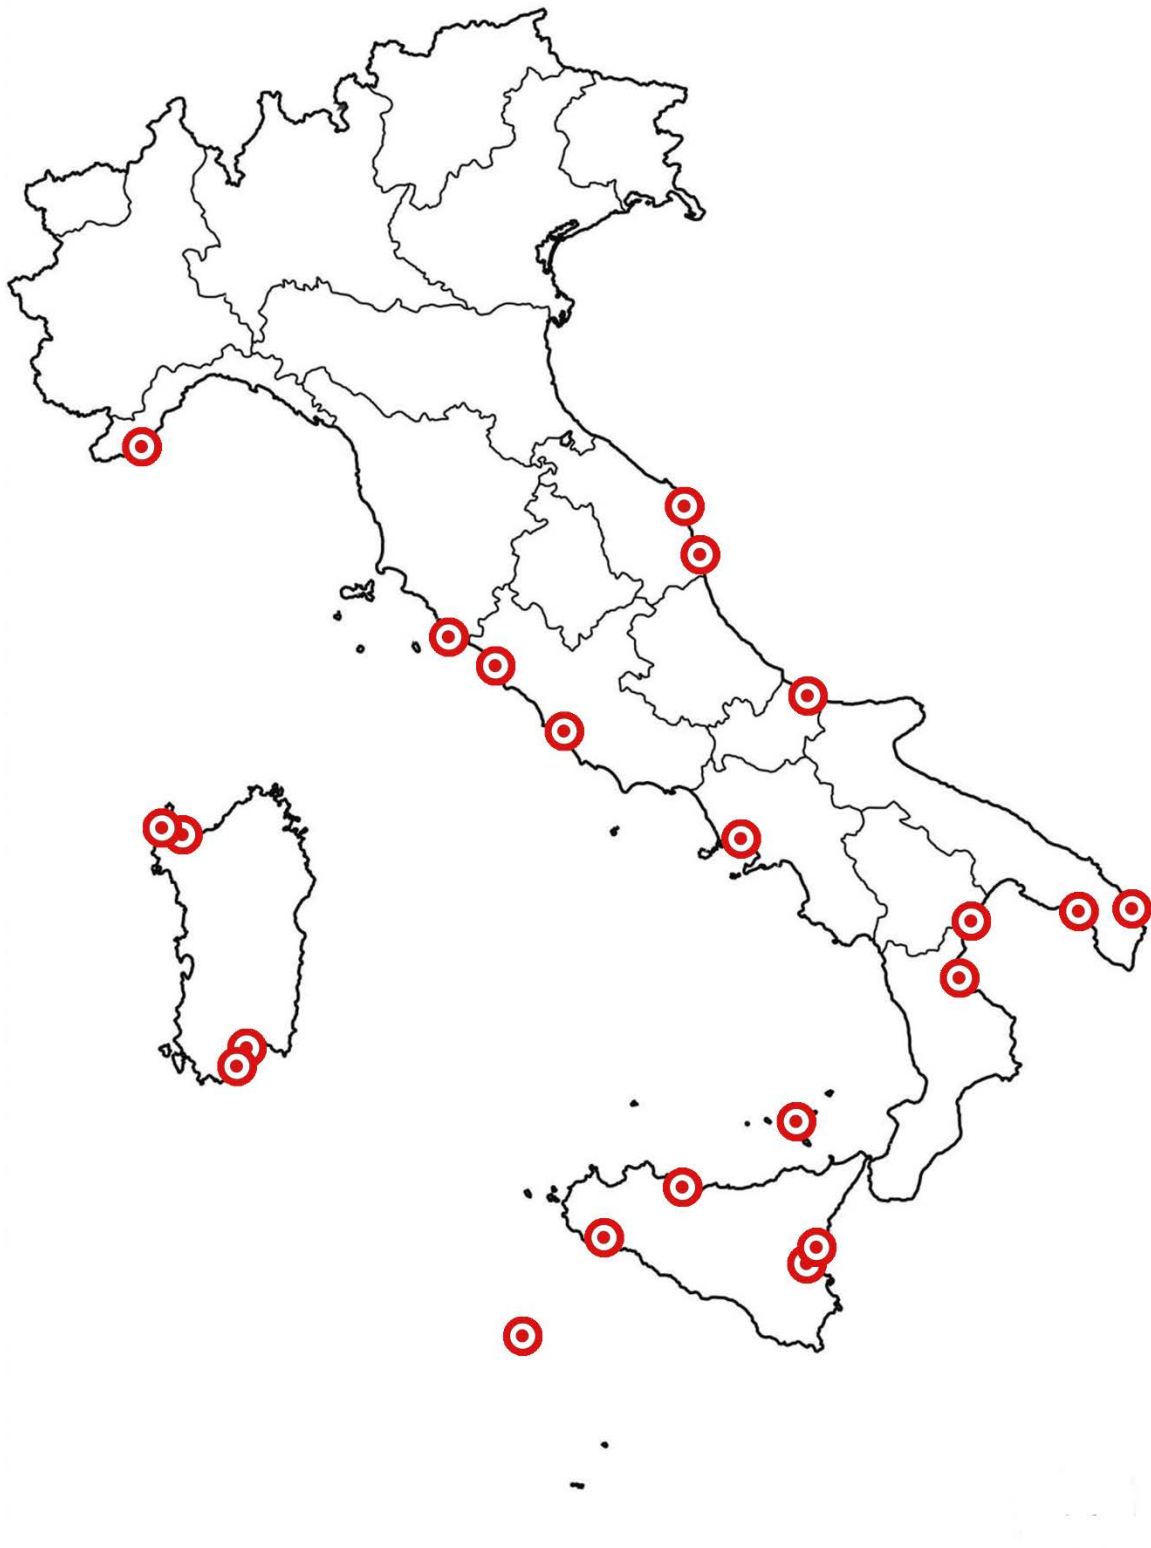

**Figure S2.** Location of the historical records for the presence of *N. ceresyi* in Italy.
